# Supplementary material
Source: publisher figshare collection journal article supplement (https://wiley.figshare.com/ndownloader/files/18232244)
Supplement: Supplementary file 1 [file 18232244]

## Sheet: Sheet1
Upregulated genes with P-value≤ 0.05
Gene	GeoMean	P-value	ORF ID	Function
PEX14	3.73134	0.00539489	orf19.1805	Ortholog(s) have protein binding, bridging activity, role in protein import into peroxisome matrix, docking and peroxisomal membrane localization
BMT4	3.24428	0.0193333	orf19.5612	Beta-mannosyltransferase; for elongation of beta-mannose chains on the acid-labile fraction of cell wall phosphopeptidomannan; 9-gene family member; regulated by Tsa1, Tsa1B; flow model biofilm induced; rat catheter biofilm repressed
FRE30	3.19101	0.0392022	orf19.6140	Protein with similarity to ferric reductases; downregulated in response to amphotericin B, estradiol, or ciclopirox olamine, and upregulated by interaction with macrophage; un-merged from orf19.6139 in a revision of Assembly 21
SOD3	2.90414	0.0274674	orf19.7111.1	Cytosolic manganese-containing superoxide dismutase; protects against oxidative stress; repressed by ciclopirox olamine, induced during stationary phase when SOD1 expression is low; Hap43-repressed; Spider and flow model biofilm induced
EFG1	2.72583	0.00779142	orf19.610	bHLH transcription factor; required for white-phase cell type, RPMI and Spider biofilm formation, hyphal growth, cell-wall gene regulation; roles in adhesion, virulence; Cph1 and Efg1 have role in host cytokine response; binds E-box
MED11	2.60802	0.00272049	orf19.6909	Ortholog(s) have TFIIH-class transcription factor binding, TFIIH-class transcription factor recruiting transcription factor activity
	2.53629	0.0153465	orf19.3697	Ortholog(s) have role in re-entry into mitotic cell cycle after pheromone arrest and endoplasmic reticulum localization
	2.47906	0.00132607	orf19.6919	Ortholog of <i>C. dubliniensis CD36</i> : Cd36_71210, <i>C. parapsilosis CDC317</i> : CPAR2_702710, <i>Candida tenuis NRRL Y-1498</i> : CANTEDRAFT_116256 and <i>Debaryomyces hansenii CBS767</i> : DEHA2E17732g
ARC18	2.46715	0.00130975	orf19.121	Putative ARP2/3 complex subunit; mutation confers hypersensitivity to cytochalasin D
	2.42516	0.00736767	orf19.1301	Ortholog(s) have cytoplasm, nucleus, ribosome localization
	2.20724	0.0493365	orf19.1780	Has domain(s) with predicted catalytic activity
	2.1763	0.0322134	orf19.6350	Ortholog of <i>C. dubliniensis CD36</i> : Cd36_11890 and <i>Candida albicans WO-1</i> : CAWG_00170
	2.07546	0.016502	orf19.4942	Ortholog of <i>Candida albicans WO-1</i> : CAWG_00134
RPT2	1.95516	0.00265093	orf19.5440	Putative ATPase of the 19S regulatory particle of the 26S proteasome; oxidative stress-induced via Cap1; Spider biofilm repressed
	1.93614	0.0108215	orf19.2934	Similar to S. cerevisiae Bud20; predicted role in cellular bud site selection; rat catheter and Spider biofilm induced
PGA39	1.85125	0.00142067	orf19.6302	Putative GPI-anchored protein
	1.84404	0.0220208	orf19.7170	Ortholog of <i>C. dubliniensis CD36</i> : Cd36_73740, <i>Candida tropicalis MYA-3404</i> : CTRG_05151 and <i>Candida albicans WO-1</i> : CAWG_05736
	1.83063	0.0150149	orf19.5462
	1.82585	0.000127393	orf19.2583.2	Pseudogene; formerly an ORF Predicted by Annotation Working Group
VPS70	1.75585	0.00518333	orf19.7106	Ortholog(s) have role in protein targeting to vacuole and endoplasmic reticulum localization
	1.67303	0.028652	orf19.3910	Has domain(s) with predicted RNA binding, ribonuclease T2 activity
	1.64778	0.0162236	orf19.1766	Secreted protein; fluconazole-induced
ALS4	1.63897	0.0208544	orf19.4555	GPI-anchored adhesin; role in adhesion, germ tube induction; growth, temperature regulated; expressed during infection of human buccal epithelial cells; repressed by vaginal contact; biofilm induced; repressed during chlamydospore formation
GAT1	1.5975	0.0327101	orf19.1275	GATA-type transcription factor; regulator of nitrogen utilization; required for nitrogen catabolite repression and utilization of isoleucine, tyrosine and tryptophan N sources; required for virulence in a mouse systemic infection model
SSY1	1.5748	0.0318168	orf19.814	Amino acid sensor; required for wild-type hyphal growth on solid serum or Lees media, not under all conditions; 12 predicted membrane spanning regions; Hap43-repressed; Spider biofilm induced
RPD3	1.56481	0.025672	orf19.2834	Histone deacetylase; regulates frequency of white-to-opaque and opaque-to-white switching; greater expression in white cells than opaque cells; has conserved deacetylation motif
MHP1	1.56238	0.022299	orf19.6621	Protein similar to S. cerevisiae Mhp1p, which is involved in microtubule stabilization; transposon mutation affects filamentous growth; possibly transcriptionally regulated upon hyphal formation; possibly an essential gene (by UAU1 method)
DIP5	1.542	0.0572293	orf19.2942	Dicarboxylic amino acid permease; mutation confers hypersensitivity to toxic ergosterol analog; induced upon phagocytosis by macrophage; Gcn4-regulated; upregulated by Rim101 at pH 8; rat catheter and Spider biofilm induced
PGA22	1.54053	0.0162178	orf19.3738	Putative GPI-anchored protein; adhesin-like protein
	1.52634	0.00963646	orf19.225	Predicted 2-hydroxyacid dehydrogenase; Hap43-repressed gene
Down regulated genes with P-value≤ 0.05
Gene	GeoMean	P-value	ORF ID	Function
RKM5	-7.34057	0.00109837	orf19.1557	Ortholog(s) have S-adenosylmethionine-dependent methyltransferase activity, role in protein methylation and cytosol, nucleus localization
	-6.58233	0.00896736	orf19.6575	Protein of unknown function; rat catheter biofilm repressed
	-5.33567	0.00192547	orf19.35.1
FGR12	-5.17225	0.0209182	orf19.5479	Protein lacking an ortholog in S. cerevisiae; transposon mutation affects filamentous growth; flow model biofilm induced
	-5.05019	0.0414612	orf19.6487	Ortholog of <i>C. parapsilosis CDC317</i> : CPAR2_808350, <i>C. dubliniensis CD36</i> : Cd36_72060, <i>Candida orthopsilosis Co 90-125</i> : CORT_0C00820 and <i>Candida albicans WO-1</i> : CAWG_05575
	-4.54147	0.0134639	orf19.2034	Ortholog of <i>C. parapsilosis CDC317</i> : CPAR2_212925, <i>C. dubliniensis CD36</i> : Cd36_15840, <i>Candida orthopsilosis Co 90-125</i> : CORT_0A12230 and <i>Candida tropicalis MYA-3404</i> : CTRG_01156
	-4.32902	0.0285931	orf19.1506	Ortholog of <i>Candida albicans WO-1</i> : CAWG_03962
MEI5	-4.15077	0.00601735	orf19.5844	Ortholog(s) have role in meiotic DNA recombinase assembly, reciprocal meiotic recombination and condensed nuclear chromosome localization
	-4.06261	0.028864	orf19.5918	Ortholog of <i>Candida albicans WO-1</i> : CAWG_02773
NRG2	-3.59583	0.000617699	orf19.6339	Transcription factor; transposon mutation affects filamentous growth
	-3.55666	0.0114271	orf19.6957
	-3.51803	0.040303	orf19.7055
	-3.44039	0.00268947	orf19.7167	Putative adhesin-like protein
	-3.32772	0.0211516	orf19.2071	Protein of unknown function; induced by alpha pheromone in SpiderM medium
	-3.32275	0.0278185	orf19.2959	Predicted ORF from Assembly 19; removed from Assembly 20; subsequently reinstated in Assembly 21 based on comparative genome analysis
	-3.21307	0.0149409	orf19.5141	Ortholog of <i>Candida albicans WO-1</i> : CAWG_05647
MND1	-3.1413	0.0163418	orf19.6142	Ortholog(s) have double-stranded DNA binding activity, role in reciprocal meiotic recombination and condensed nuclear chromosome localization
	-3.1352	0.0129272	orf19.6859	Ortholog of <i>C. dubliniensis CD36</i> : Cd36_44860, <i>Candida tropicalis MYA-3404</i> : CTRG_04054 and <i>Candida albicans WO-1</i> : CAWG_03295
HSP21	-3.01404	0.0486981	orf19.822	Small heat shock protein; role in stress response and virulence; fluconazole-downregulated; induced in cyr1 or ras1 mutant; stationary phase enriched protein; detected in some, not all, biofilm extracts; Spider biofilm induced
	-3.0036	0.00407633	orf19.3059.1	ORF added to Assembly 21 based on comparative genome analysis; overlaps orf19.3059.2, which is annotated as a blocked reading frame
	-2.99515	0.0264034	orf19.5140	Protein of unknown function; rat catheter and Spider biofilm induced
	-2.91587	0.028926	orf19.513	Protein with a DNA-binding domain, similar to S. cerevisiae meiosis-specific transcription factor Ndt80p
	-2.76299	0.0224049	orf19.3931.1	Pseudogene; added to Assembly 21 based on comparative genome analysis
	-2.75213	0.0537619	orf19.6911	Ortholog of <i>Candida albicans WO-1</i> : CAWG_05482
	-2.74001	0.0113307	orf19.1239	Secreted protein; exogenously expressed protein is a substrate for Kex2 processing in vitro; fluconazole-regulated; Spider biofilm induced
	-2.70758	0.00325676	orf19.3931.2
	-2.62786	0.0111055	orf19.3159.4	Ortholog of Candida albicans WO-1 : CAWG_04594
PGA46	-2.61856	0.000140008	orf19.3638	Putative GPI-anchored protein; secreted; fluconazole-induced
FGR18	-2.60881	0.00552637	orf19.4067	Protein lacking an ortholog in S. cerevisiae; transposon mutation affects filamentous growth
NAD1	-2.58528	0.0466026	CaalfMp03	Subunit 6 of NADH:ubiquinone oxidoreductase (NADH:ubiquinone dehydrogenase), a multisubunit enzyme complex (complex I) of the mitochondrial inner membrane that catalyzes the first step in mitochondrial respiration
	-2.55208	0.0128578	orf19.6949	Ortholog of <i>Candida albicans WO-1</i> : CAWG_02687
	-2.49463	0.0208054	orf19.2332	Ortholog of <i>C. parapsilosis CDC317</i> : CPAR2_210560, <i>C. dubliniensis CD36</i> : Cd36_10180, <i>Candida orthopsilosis Co 90-125</i> : CORT_0A09890 and <i>Candida tropicalis MYA-3404</i> : CTRG_04072
	-2.47634	0.026131	orf19.4057	Ortholog of <i>Candida albicans WO-1</i> : CAWG_00885
AGA1	-2.47231	0.0581499	orf19.935	Protein with some similarity to agglutinin subunit; expression regulated upon white-opaque switch; Spider biofilm induced
	-2.47035	0.00752636	orf19.2585	Ortholog of <i>Candida albicans WO-1</i> : CAWG_01548
	-2.42614	0.0142067	orf19.4095	Ortholog of <i>C. parapsilosis CDC317</i> : CPAR2_407020, <i>C. dubliniensis CD36</i> : Cd36_23460, <i>Debaryomyces hansenii CBS767</i> : DEHA2B02002g and <i>Pichia stipitis Pignal</i> : PICST_31649
YMR244W	-2.41809	0.0420599	orf19.5896	Protein of unknown function; induced by alpha pheromone in SpiderM medium
	-2.40348	0.0091661	orf19.2804	Ortholog of <i>C. dubliniensis CD36</i> : Cd36_83980, <i>C. parapsilosis CDC317</i> : CPAR2_102620, <i>Candida tenuis NRRL Y-1498</i> : CANTEDRAFT_134550 and <i>Debaryomyces hansenii CBS767</i> : DEHA2D12100g
	-2.38786	0.00795286	orf19.6164	Ortholog of <i>Candida albicans WO-1</i> : CAWG_02424
	-2.35902	0.010706	orf19.3748	Protein of unknown function; orf19.3747 and orf19.3748 are short, overlapping ORFs in intergenic region between 2 oligopeptide transporter-encoding genes; flow model biofilm induced
	-2.30949	0.00266017	orf19.3906	Protein of unknown function; mutants are viable
	-2.27011	0.000556796	orf19.3868
	-2.24789	0.0190567	orf19.3907	Ortholog of <i>Candida albicans WO-1</i> : CAWG_04797
PPT1	-2.24477	0.00515375	orf19.1673	Putative serine/threonine phosphatase; induced in high iron
	-2.20962	0.0209351	orf19.6922
	-2.1909	0.0227217	orf19.3903	Ortholog of <i>Candida albicans WO-1</i> : CAWG_04793
	-2.16494	0.0372179	orf19.4196
	-2.16242	0.0158878	orf19.6661	Predicted ORF from Assembly 19; removed from Assembly 20; subsequently reinstated in Assembly 21 based on comparative genome analysis
	-2.15317	0.0201492	orf19.3186	Ortholog of <i>Candida albicans WO-1</i> : CAWG_04571
	-2.09963	0.000327133	orf19.1123
	-2.06655	0.0328536	orf19.6115
	-2.05503	0.0074972	orf19.3284	Ortholog of <i>Candida albicans WO-1</i> : CAWG_01431
COX2	-2.0457	0.00190611	CaalfMp01	Subunit II of cytochrome c oxidase, which is the terminal member of the mitochondrial inner membrane electron transport chain; one of three mitochondrially-encoded subunits
CRD2	-2.02609	0.00539081	orf19.4674.1	Metallothionein; for adaptation to growth in high copper; basal transcription is cadmium-repressed; Ssn6 regulated; complements copper sensitivity of an S. cerevisiae cup1 mutant; regulated by Sef1, Sfu1, and Hap43; Spider biofilm induced
	-1.99943	0.00566084	orf19.533	Ortholog of <i>Candida albicans WO-1</i> : CAWG_01778
	-1.99279	0.00949106	orf19.7002	Ortholog of <i>C. parapsilosis CDC317</i> : CPAR2_806990, <i>Candida tenuis NRRL Y-1498</i> : CANTEDRAFT_122709, <i>Debaryomyces hansenii CBS767</i> : DEHA2E00110g and <i>Pichia stipitis Pignal</i> : PICST_30109
	-1.98916	0.0516092	orf19.1449	Protein of unknown function; induced in azole-resistant strain that overexpresses MDR1; protein present in exponential and stationary growth phase yeast cultures; Spider biofilm induced
	-1.98186	0.0589931	orf19.69.2
	-1.92144	0.00711219	orf19.4916
TRM1	-1.90107	0.0215766	orf19.3265
PGA13	-1.8767	0.0196587	orf19.6420	GPI-anchored cell wall protein involved in cell wall synthesis; required for normal cell surface properties; induced in oralpharyngeal candidasis; Spider biofilm induced; Bcr1-repressed in RPMI a/a biofilms
PGA16	-1.86272	0.0330702	orf19.848	Putative GPI-anchored protein
YBR137W	-1.83812	0.00561547	orf19.7199	Ortholog(s) have TRC complex, nucleus localization
	-1.81756	0.004545	orf19.823	Protein of unknown function; Spider biofilm induced
TCD5	-1.78565	0.0392923	orf19.6999	Predicted oxidoreductase; rat catheter biofilm repressed
	-1.71699	0.00213016	orf19.2025
CRD1	-1.70372	0.0253119	orf19.6100	Cardiolipin synthase; ortholog of S. cerevisiae Crd1; transcript is upregulated in clinical isolates from HIV+ patients with oral candidiasis; mutants are viable; Spider biofilm repressed
	-1.59624	0.0558218	orf19.4271	Predicted ORF from Assembly 19; removed from Assembly 20; subsequently reinstated in Assembly 21 based on comparative genome analysis
	-1.71699	0.00213016	orf19.2025
PLC2	-1.55985	0.00145801	orf19.5797	Phosphatidylinositol (PtdIns)-specific phospholipase C (PI-PLC); predicted type 2 membrane protein; role in, and regulated by, filamentation, Nrg1 and Tup1; no mouse systemic virulence role; orf19.5797 and orf19.1586 are almost identical
MAL2	-1.55065	0.0515843	orf19.7668	Alpha-glucosidase; hydrolyzes sucrose for sucrose utilization; transcript regulated by Suc1, induced by maltose, repressed by glucose; Tn mutation affects filamentous growth; upregulated in RHE model; rat catheter and Spider biofilm induced
	-1.54047	0.0541915	orf19.3988	Putative adhesin-like protein; induced by Mnl1 under weak acid stress; rat catheter and Spider biofilm induced
MRD1	-1.50187	0.0281822	orf19.1646	Ortholog(s) have rRNA primary transcript binding activity
COQ10	-1.5016	0.0441223	orf19.6662	Putative coenzyme Q (ubiquinone) binding protein; transcript is upregulated in clinical isolates from HIV+ patients with oral candidiasis
YER163C	-1.49851	0.00445196	orf19.372	Putative protein of unknown function; Hap43p-repressed gene
